# Supplementary material for: Protein S100-A7 Derived from Digested Dentin Is a Critical Molecule for Dentin Pulp Regeneration
Source: PubMed Central journal article supplement (PMC6769619; doi:10.3390/cells8091002), 2019-08-29
Supplement: cells-08-01002-s001.pdf [file cells-08-01002-s001.pdf]

# Protein S100-A7 as a critical molecule for dentin pulp regeneration derived from digested

Shungo Komichi, Yusuke Takahashi, Motoki Okamoto, Manahil Ali, Masakatsu Watanabe,  
Hailing Huang, Takeo Nakai, Paul Cooper, Mikako Hayashi

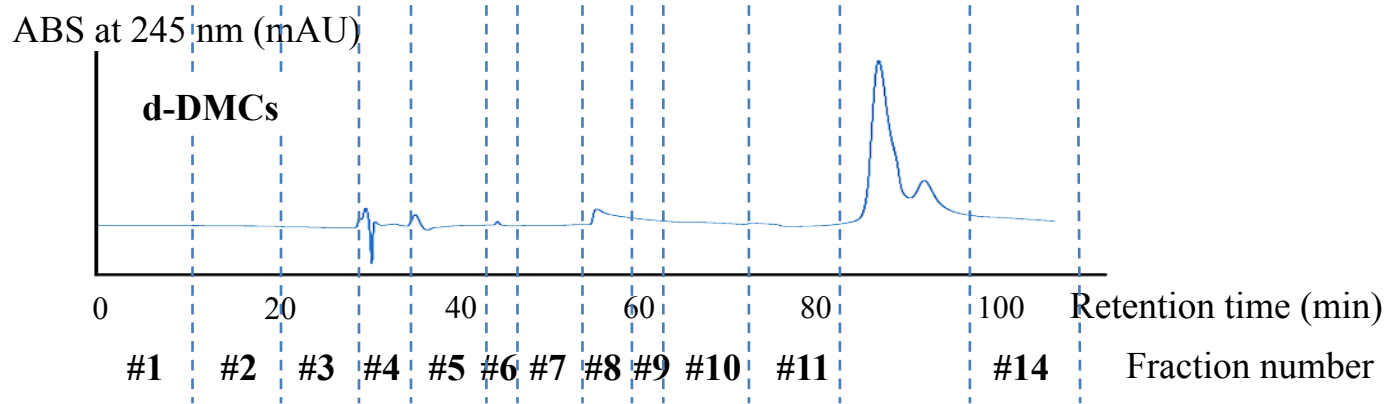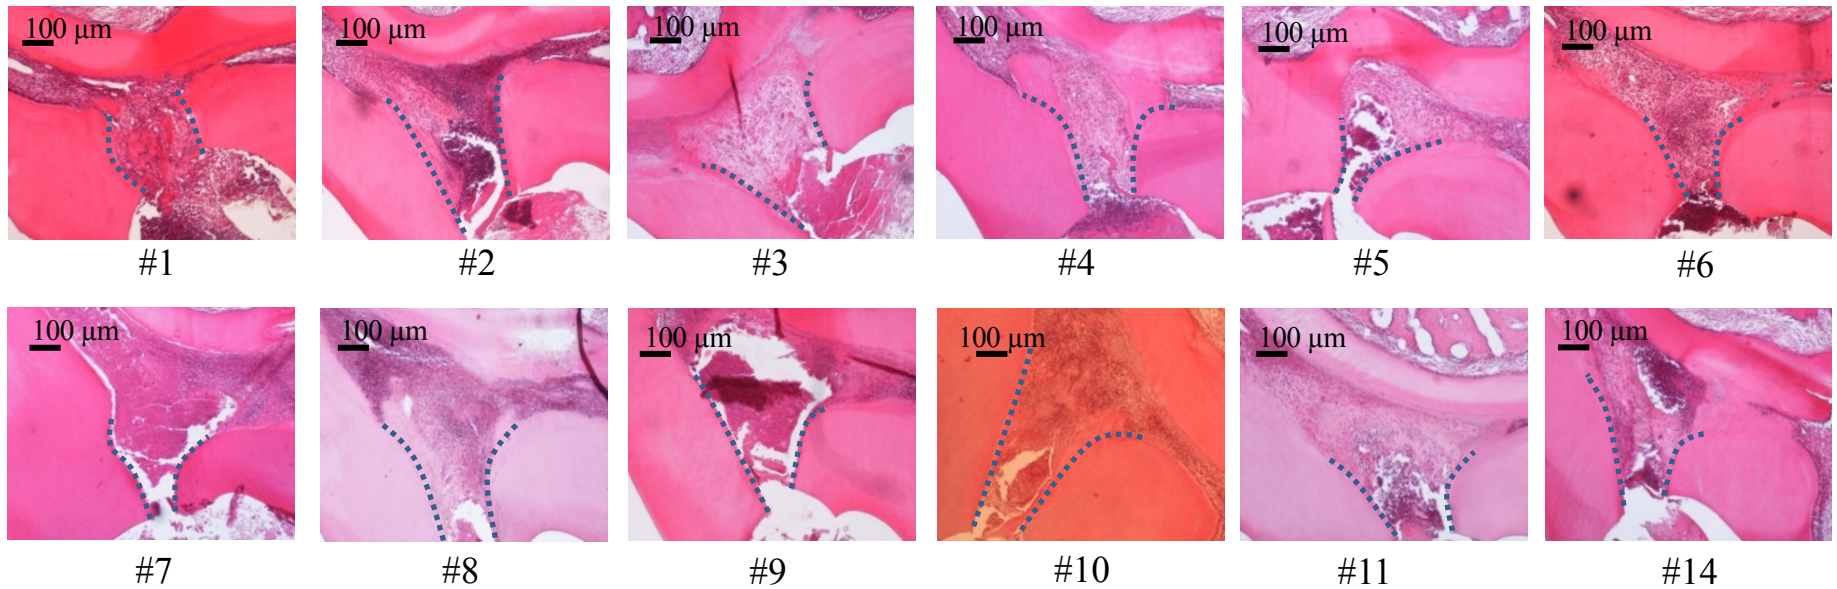

## Supplementary Figure S1

Histological images of tertiary dentin using fractions #1–11 and #14 of d-DMCs.  
No or little tertiary dentin was observed in all specimens (n=3).

| Protein ID                     | Protein description              | Protein ratio | Peptide PEP |
|--------------------------------|----------------------------------|---------------|-------------|
| tr A0A024R1X8 A0A024R1X8_HUMAN | Junction plakoglobin             | 9999          | 0.005       |
| sp P31151 S10A7_HUMAN          | Protein S100-A7                  | 9999          | 1.095e-06   |
| sp P01834 IGKC_HUMAN           | Ig kappa chain C region          | 9999          | 3.015e-04   |
| tr A0A0S2Z3E8 A0A0S2Z3E8_HUMAN | Fibrinogen alpha chain isoform 2 | 9999          | 9.417e-03   |
| tr F8W0P7 F8W0P7_HUMAN         | ATP synthase subunit beta        | 3.345         | 3.213e-36   |
| sp P15924 DESP_HUMAN           | Desmoplakin                      | 1.076         | 2.000e-04   |
| sp Q02413 DSG1_HUMAN           | Desmoglein-1                     | 9999          | 4.041e-09   |
| sp Q6UWP8 SBSN_HUMAN           | Suprabasin                       | 9999          | 4.489e-07   |
| tr A8K9P0 A8K9P0_HUMAN         | cDNA FLJ78413                    | 14.17         | 7.7449e-06  |

### Supplementary Table S1

Description of nine common proteins with higher abundance in d-DMCs

| Protein ID                     | Protein description                                      | Protein ratio  | Peptide PEP |
|--------------------------------|----------------------------------------------------------|----------------|-------------|
| sp P05109 S10A8_HUMAN          | Protein S100-A8                                          | in d-DMCs only | 1.270e-27   |
| sp P12273 PIP_HUMAN            | Prolactin-inducible protein                              | in d-DMCs only | 0.036       |
| sp M0R1G4 YA044_HUMAN          | Uncharacterized protein<br>ENSP00000471857               | in d-DMCs only | 2.531e-06   |
| sp P02675 FIBB_HUMAN           | Fibrinogen beta chain                                    | in d-DMCs only | 6.593e-07   |
| sp Q6KB66 K2C80_HUMAN          | Keratin, type II cytoskeletal 80                         | in d-DMCs only | 1.480e-04   |
| sp Q7RTS7 K2C74_HUMAN          | Keratin, type II cytoskeletal 74                         | in d-DMCs only | 2.035e-06   |
| sp Q8N1N4 K2C78_HUMAN          | Keratin, type II cytoskeletal 78                         | in d-DMCs only | 0.035       |
| sp Q9NZT1 CALL5_HUMAN          | Calmodulin-like protein 5                                | in d-DMCs only | 5.465e-04   |
| tr A0A068LN13 A0A068LN13_HUMAN | Ig heavy chain variable region                           | in d-DMCs only | 7.485e-04   |
| tr A0N4V7 A0N4V7_HUMAN         | HCG2039797                                               | in d-DMCs only | 0.010       |
| tr A7XZE4 A7XZE4_HUMAN         | Beta tropomyosin isoform                                 | in d-DMCs only | 3.491e-04   |
| tr B4DKG7 B4DKG7_HUMAN         | cDNA FLJ60633, highly similar to Homo sapiens secernin 3 | in d-DMCs only | 0.013       |
| tr E7EUT5 E7EUT5_HUMAN         | Glyceraldehyde-3-phosphate dehydrogenase                 | in d-DMCs only | 1.719e-03   |
| tr H0YBX3 H0YBX3_HUMAN         | HUMAN Ribonuclease UK114                                 | in d-DMCs only | 2.119e-04   |
| tr H0YKX5 H0YKX5_HUMAN         | Tropomyosin alpha-1 chain                                | in d-DMCs only | 0.016       |
| tr K7EQW8 K7EQW8_HUMAN         | Tropomyosin alpha-4 chain                                | in d-DMCs only | 1.239e-04   |
| tr Q13707 Q13707_HUMAN         | ACTA2 protein                                            | in d-DMCs only | 4.271e-04   |
| tr Q572P3 Q572P3_HUMAN         | Tyrosine-protein kinase BTK isoform 52                   | in d-DMCs only | 0.016       |
| tr Q6P670 Q6P670_HUMAN         | TNNT3 protein                                            | in d-DMCs only | 9.196e-04   |
| tr Q9BWU5 Q9BWU5_HUMAN         | Mutant hemoglobin beta chain                             | in d-DMCs only | 0.006       |
| tr Q9P173 Q9P173_HUMAN         | PRO2275                                                  | in d-DMCs only | 7.072e-05   |
| tr U3PXP0 U3PXP0_HUMAN         | Alpha globin chain                                       | in d-DMCs only | 0.019       |

## Supplementary Table S2

Description of 22 proteins unique to d-DMCs
